# Supplementary material for: Does exposure to cigarette brands increase the likelihood of adolescent e-cigarette use? A cross-sectional study
Source: PubMed Central journal article supplement (PMC4769402; doi:10.1136/bmjopen-2015-008734), 2016-02-23
Supplement: bmjopen-2015-008734supp_tables.pdf [file bmjopen-2015-008734supp_tables.pdf]

Supplementary tables

The Model 5 in the table below shows the effect of including parental smoking, best friend smoking and current smoking in the logistic regression on e-cigarette experience (extending Model 2 in Table 3 main paper). Model 6 shows the effect of introducing e-cigarette advertising recall (extending Model 2 Table 3 main paper).

Table 1 Logistic regression on e-cigarette experience with additional variables: parental and best friend smoking status (Model 5) or e-cigarette advertising recall (Model 6).

| Variable                              | Model 5 OR<br>(99% CI)     | Model 6 OR<br>(99% CI)      |
|---------------------------------------|----------------------------|-----------------------------|
| <b>Current smoker</b>                 | 4.34 (0.96 to 19.55)       | <b>6.23 (1.24 to 31.36)</b> |
| <b>Not current smoker</b>             | 1                          | <b>1</b>                    |
| <b>Never smoked</b>                   | <b>0.12 (0.06 to 0.26)</b> | <b>0.10 (0.05 to 0.22)</b>  |
| <b>Ever smoked</b>                    | 1                          | 1                           |
| <b>Brand recognition</b>              | <b>1.17 (1.02 to 1.35)</b> | <b>1.24 (1.10 to 1.40)</b>  |
| <b>E-cigarette advertising recall</b> |                            | 1                           |
| <b>Yes</b>                            |                            | 0.88 (0.56 to 1.39)         |
| <b>Gender male</b>                    | 1                          | 1                           |
| <b>female</b>                         | 0.92 (0.38 to 2.22)        | 1.02 (0.42 to 2.47)         |
| <b>Family Affluence Scale (1 low)</b> | 1                          | 1                           |

|                                        |                      |                     |
|----------------------------------------|----------------------|---------------------|
| <b>Family Affluence Scale (2 med)</b>  | 1.45 (1.03 to 2.03)  | 1.34 (0.69 to 2.59) |
| <b>Family Affluence Scale (3 high)</b> | 0.96 (0.28 to 3.27)  | 0.75 (0.15 to 3.64) |
| <b>White ethnic group</b>              | 1                    | 1                   |
| <b>Other ethnic group</b>              | 11.76 (0.47 to 6.64) | 1.98 (0.41 to 9.58) |
| <b>Age in years</b>                    | 0.96 (0.71 to 1.29)  | 0.99 (0.74 to 1.33) |
| <b>Parents smoke No</b>                | 1                    |                     |
| <b>Yes</b>                             | 1.42 (0.59 to 3.43)  |                     |
| <b>Best friend smokes yes</b>          | 2.08 (0.79 to 5.49)  |                     |
| <b>No</b>                              | 1                    |                     |

Model 5 n=860 Pseudo R2 =0.35 Hosmer-Lemeshow  $\chi^2(10) = 5.61$  p = 0.69

Model 6 n=870 Pseudo R2=0.36 Hosmer-Lemeshow  $\chi^2(10) = 10.72$  p= 0.22

The Model 7 in table 7 below shows the effect of including parental smoking, best friend smoking and current smoking in the logistic regression on intention to try e-cigarettes (extending Model 4 in Table 5 in main paper). Model 6 shows the effect of introducing e-cigarette advertising recall (extending Model 4 Table 5 in main paper).

Table 2 Logistic regression on intention to try e-cigarettes with additional variables: parental and best friend smoking status (Model 7) or e-cigarette advertising recall (Model 8)

| <b>Variable</b>                   | <b>Model 7 Odds ratio<br/>(99% CI)</b> | <b>Model 8 Odds ratio<br/>(99% CI)</b> |
|-----------------------------------|----------------------------------------|----------------------------------------|
| Never smoked                      | <b>0.07 (0.02 to 0.25)</b>             | <b>0.03 (0.01 to 0.09)</b>             |
| Ever smoked                       | <b>1</b>                               | <b>1</b>                               |
| Brand recognition                 | <b>1.41 (1.07 to 1.87)</b>             | <b>1.45 (1.12 to 1.89)</b>             |
| Tobacco outlet density            | <b>1.20 (1.08 to 1.34)</b>             | <b>1.17 (1.02 to 1.33)</b>             |
| Hanging round in the street ≥1/wk | <b>3.78 (1.93 to 7.39)</b>             | <b>3.58 (1.82 to 7.06)</b>             |
| Hanging round in the street <1/wk | <b>1</b>                               | <b>1</b>                               |
| E-cig advert recall –yes          |                                        | 2.44 (0.32 to 18.42)                   |
| No                                |                                        | 1                                      |
| Parental smoking: No              | 1                                      |                                        |

|                               |                             |                            |
|-------------------------------|-----------------------------|----------------------------|
| Yes                           | 0.94 (0.54 to 1.65)         |                            |
| Best friend smoking           | <b>8.18 (2.73 to 24.55)</b> |                            |
| Gender male                   | <b>1</b>                    | 1                          |
| female                        | <b>0.49 (0.27 to 0.91)</b>  | 0.56 (0.38 to 0.84)        |
| Family Affluence Scale (low)  | <b>1</b>                    | 1                          |
| Family Affluence Scale (med)  | 1.70 (0.48 to 5.96)         | 1.82 (0.64 to 5.16)        |
| Family Affluence Scale (high) | 1.47 (0.36 to 5.95)         | <b>1.83 (1.21 to 2.78)</b> |
| White                         | 1                           | 1                          |
| Other ethnic group            | 0.43 (0.02 to 9.81)         | 0.83 (0.06 to 11.23)       |
| Age in years                  | <b>0.55 (0.37 to 0.81)</b>  | 0.48 (0.16 to 1.46)        |

Model 7 n=689 Hosmer–Lemeshow goodness-of-fit (10) =3.04 p=.093 Pseudo R<sup>2</sup>

value is 0.55. Model 8 n=698 Hosmer–Lemeshow goodness-of-fit (10) = 2.56

p=0.96 Pseudo R<sup>2</sup> value is 0.49

**Bold text:**p<0.01

Table 3 Differences between sample in smallest analysis (model 7) and excluded cases.

|                              | In Model 7<br>N=689 | Not in model 7<br>n=570 |
|------------------------------|---------------------|-------------------------|
| Brand awareness<br>Mean (sd) | 3.45 (2.66)         | 2.70 (2.47)             |
| Never smoked<br>N (%)        | 560 (81.28%)        | 556 (81.05%)            |
| Male<br>N(%)                 | 301 (43.69%)        | 420 (59.66%)            |
| FAS low<br>N (%)             | 224 (32.51%)        | 245 (34.27%)            |
| FAS medium<br>N (%)          | 219 (31.79%)        | 247 (34.55%)            |
| FAS high<br>N (%)            | 246 (35.70%)        | 223 (31.19%)            |
| Other ethnic group           | 28 (4.06%)          | 67 (9.70%)              |
| Age                          | 14.56 (1.04)        | 14.36 (1.02)            |

The participants not included are more likely to be male, low family affluence and non-white ethnic group. Their missing status is mostly due to not reporting a postcode upon which the tobacco outlet density measure was based.
